# Supplementary material for: The Challenge for a Correct Diagnosis of Refractory Thrombocytopenia: ITP or MDS with Isolated Thrombocytopenia?
Source: MDPI journal article supplement (doi:10.3390/cancers16081462), 2024-04-11
Supplement: s1 [file s1]

**Supplementary Materials:**

**Table S1.** Cytogenetic Scoring System in MDS patients

| Cytogenetic Scoring System in MDS <sup>1</sup> Patients |                           |                                                                                 |                        |                                                      |
|---------------------------------------------------------|---------------------------|---------------------------------------------------------------------------------|------------------------|------------------------------------------------------|
| Prognostic cytogenetic subgroups                        | Percentage of patients, % | Karyotype                                                                       | Median survival, years | Median time to 25% AML <sup>2</sup> evolution, years |
| Very Good                                               | 4                         | –Y, del(11q)                                                                    | 5.4                    | NR <sup>3</sup>                                      |
| Good                                                    | 72                        | Normal, del(5q), del(12p), del(20q), double including del(5q)                   | 4.8                    | 9.4                                                  |
| Intermediate                                            | 13                        | del(7q), +8, +19, i(17q), any other single or double independent clones         | 2.7                    | 2.5                                                  |
| Poor                                                    | 4                         | –7, inv(3)/t(3q)/del(3q), double including –7/del(7q), complex: 3 abnormalities | 1.5                    | 1.7                                                  |
| Very Poor                                               | 7                         | Complex: > 3 abnormalities                                                      | 0.7                    | 0.7                                                  |

<sup>1</sup>MDS myelodysplastic syndrome; <sup>2</sup>AML acute myeloid leukemia; <sup>3</sup>NR not reached

**Table S2.** IPSS-R prognostic values

| IPSS-R <sup>1</sup> prognostic score values |           |             |            |            |              |          |           |
|---------------------------------------------|-----------|-------------|------------|------------|--------------|----------|-----------|
| Prognostic value                            | 0 points  | 0.5 points  | 1 points   | 1.5 points | 2 points     | 3 points | 4 points  |
| Cytogenetics*                               | Very Good | –           | Good       | –          | Intermediate | Poor     | Very Poor |
| BM <sup>2</sup> blasts, %                   | ≤ 2       | –           | > 2 to < 5 | –          | 5 to 10      | > 10     | –         |
| Hemoglobin, g/dL                            | ≥ 10      | –           | 8 to < 10  | < 8        | –            | –        | –         |
| Platelets, ×10 <sup>9</sup> /L              | ≥ 100     | 50 to < 100 | < 50       | –          | –            | –        | –         |
| ANC <sup>3</sup> , ×10 <sup>9</sup> /L      | ≥ 0.8     | < 0.8       | –          | –          | –            | –        | –         |

\*According to Table 4

– indicates not applicable

<sup>1</sup>IPSS-R revised International Prognostic Scoring System; <sup>2</sup>BM bone marrow; <sup>3</sup>ANC absolute neutrophil count

**TableS 3.** IPSS-R prognostic risk categories and scores

| IPSS-R <sup>1</sup> prognostic risk categories/scores |            |
|-------------------------------------------------------|------------|
| Risk category                                         | Risk score |
| Very Low                                              | ≤ 1.5      |
| Low                                                   | > 1.5-3    |
| Intermediate                                          | > 3-4.5    |
| High                                                  | > 4.5-6    |
| Very High                                             | > 6        |

<sup>1</sup>IPSS-R revised International Prognostic System
